# Supplementary material for: IL-TEM investigations on the degradation mechanism of Pt/C electrocatalysts with different carbon supports
Source: Royal Society of Chemistry journal article supplement (doi:10.1039/c0ee00248h), 2010-10-21
Supplement: c0ee00248h.pdf [file c0ee00248h.pdf]

## IL-TEM investigations on the degradation mechanism of Pt/C electrocatalysts with different carbon supports

Katrin Hartl, Marianne Hanzlik, and Matthias Arenz \*

### Supporting information

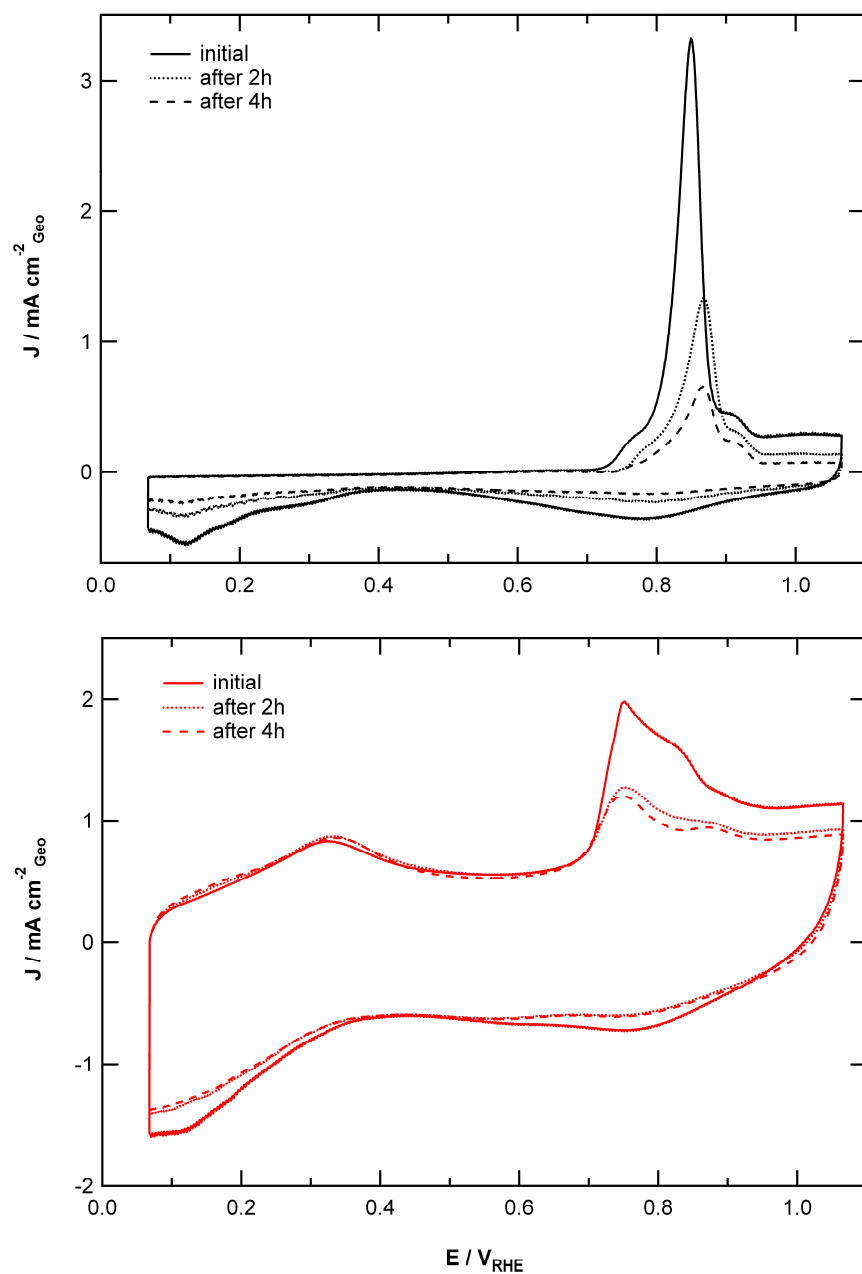

Figure S1. CO stripping curves of catalyst I (upper part) and catalyst II (lower part) in their initial state as well as after 2h and 4h accelerated degradation treatment. The treatment

consisted of potential cycling between 0.4 and 1.4V<sub>RHE</sub> at 1Vs<sup>-1</sup> in Argon saturated 0.1M HClO<sub>4</sub>.
